# Supplementary material for: Interface engineering of heterostructured NiSn@NiMn–LDH as a bifunctional electrocatalyst for the oxygen evolution reaction and hydrogen evolution reaction
Source: Royal Society of Chemistry journal article supplement (doi:10.1039/d5nj03783b), 2025-01-01
Supplement: d5nj03783b1.pdf [file d5nj03783b1.pdf]

## Supplementary Material

### Interface engineering of heterostructured NiSn@NiMn-LDH as a bifunctional electrocatalyst for oxygen evolution reaction and hydrogen evolution reaction

Wei Gao<sup>a,b,\*</sup>, Chao He<sup>a</sup>, Yuzun Li<sup>a</sup>, Yufeng Li<sup>a,\*</sup>, Weiwei Tang<sup>a</sup>, Zhe Zhang<sup>a</sup>, Houxiang Sun<sup>a</sup>, Jitao Zhao<sup>c</sup>

<sup>a</sup> School of Biological and Chemistry Engineering, Panzhihua University, Panzhihua, 617000, China

<sup>b</sup> Sichuan Technology & Engineering Research Center for Vanadium Titanium Materials, Panzhihua, 617000, China

<sup>c</sup> School of Civil and Architecture Engineering, Panzhihua University, Panzhihua, 617000, China

#### \*Corresponding Authors

Wei Gao, E-mail: 15046674011@163.com

Yufeng Li, E-mail: lyfpzh308@163.com

## 1. Experimental

### 1.1 Chemicals

$\text{NiCl}_2 \cdot 6\text{H}_2\text{O}$ ,  $\text{MnCl}_2 \cdot 4\text{H}_2\text{O}$ ,  $\text{SnCl}_2 \cdot 2\text{H}_2\text{O}$ , ethyl alcohol, NaOH, KOH were bought from Shinopharm Chemical Reagent Co., Ltd.  $\text{RuO}_2$ , Nafion (5 wt%) were obtained by Aladdin Chemical Reagent Co., Ltd.  $\text{NaH}_2\text{PO}_2 \cdot \text{H}_2\text{O}$  was bought from Xiya Chemical Technology (Shandong) Co., Ltd. Ti mesh was used as the supporting material.

### 1.2 Pretreatment of TM

TM was introduced into 2 mol  $\text{L}^{-1}$  HCl, ethanol, deionized water and ultrasonicated for 20 min with the aim of removing the oxide layer on the surface of TM. The cleaned TM was obtained after drying at 60 °C for 1 h in a vacuum oven.

### 1.3 Synthesis of $\text{RuO}_2/\text{TM}$

3.21 mg  $\text{RuO}_2$  powder was dispersed in 50  $\mu\text{L}$  of deionized water, 50  $\mu\text{L}$  of ethanol, and 14  $\mu\text{L}$  of 5 wt.% Nafion solution, and ultrasonically treated for a certain period of time to form a even suspension. Afterwards, 38  $\mu\text{L}$  of the above-mentioned uniform suspension was coated on the surface of TM ( $1 \times 1 \text{ cm}^2$ ). After drying at room temperature for 24 h,  $\text{RuO}_2/\text{TM}$  electrode was obtained. The average mass load of  $\text{RuO}_2$  on TM surface was approximately  $1.07 \text{ mg cm}^{-2}$ .

### 1.4 Materials characterization

Rigaku Ultima IV X-ray diffraction (XRD) with Cu  $\text{K}\alpha$  radiation ( $\lambda = 1.540538 \text{ \AA}$ ) was used to investigate the crystalline structure of samples. Thermo Scientific K-Alpha X-ray photoelectron spectroscopy (XPS) was applied to explain the composition and valence state of samples. Thermo Scientific Apreo 2C field emission scanning electron microscope (SEM) was used to observe the microstructure and morphology of samples, and the elemental distribution state of samples was investigated by OXFORD ULTIM Max 65 energy-dispersive X-ray spectroscopy, which was attached with SEM. The mass load of as-constructed electrocatalysts on the surface of TM was tested by PE Avio 200 ICP-OES.

### 1.5 Electrochemical measurements

The electrochemical activity was evaluated by CS315M electrochemical station (Corrtest Instrument Corp., Ltd, Wuhan). OER and HER were measured through three electrode system with Pt mesh as counter electrode, mercury oxide electrode (Hg/HgO) as reference electrode, the constructed electrode as working electrode. What's more, electrolytic solution was 1 mol L<sup>-1</sup> KOH, and the pH=13.88.

For a better comparison, the Hg/HgO potential was converted to a reversible hydrogen electrode (RHE) based on equation S1

$$E_{RHE}=E_{Hg/HgO}+0.059\times pH+0.098=E_{Hg/HgO}+0.0917 \quad (S1)$$

The potentials of linear sweep voltammetry (LSV) curves of OER and HER were corrected by iR compensation, which were calculated by Eq. S2 and Eq. S3:

$$E_{compensated}(OER) = E_{measured}(OER) - iR \quad (S2)$$

$$E_{compensated}(HER) = E_{measured}(HER) - iR \quad (S3)$$

The overpotential ( $\eta$ ) was used to estimate OER and HER activity.  $\eta$  was calculated by Eq. S4 and Eq. S5,

$$\eta(V, OER) = E_{RHE}(OER) - 1.23 \quad (S4)$$

$$\eta(V, HER) = 0 - E_{RHE}(HER) \quad (S5)$$

Tafel slope was applied to estimate catalytic and kinetics of as-constructed electrode toward OER and HER, which was acquired through fitting the linear region of LSV curve. Tafel slope was obtained by Eq. S6 [1]:

$$\eta = a + b \log J \quad (S6)$$

Where  $J$  is the current density.

The effective electrochemical active surface area (ECSA) of the constructed electrode was acquired through CV curves at non-faradaic domain from 0.02 V to 0.12 V at the scan rates of 50, 100, 150 200 and 250 mV s<sup>-1</sup>. The geometric double layer capacitance ( $C_{dl}$ ) was the slope value by plotting the difference of current density ( $\Delta J$ ) between the anodic and cathodic sweeps ( $J_{anodic} - J_{cathodic}$ )/2 against the scan rate. In particular, ECSA value was estimated by  $C_{dl}$  basing on Eq. S7,

$$ECSA = \frac{C_{dl}}{C_s} \quad (S7)$$

Where  $C_s$  is the specific capacitance, and  $C_s$  is estimated to the value of  $0.04 \text{ mF cm}^{-2}$  [2, 3].

The roughness factor (RF) was calculated by Eq. S8:

$$RF = \frac{ECSA}{GSA} \quad (S8)$$

where GSA is the geometric surface area of the electrode, the value is  $1.0 \text{ cm}^2$  in this research.

$J_{ECSA}$  represented the normalization of  $J$  with ECSA, which was estimated by Eq. S9,

$$J_{ECSA} = \frac{J}{ECSA} \quad (S9)$$

where  $J$  is the current density.

Electrocatalytic stability of OER and HER was measured through successive CV curves, multipotential test, multicurrent test and chronoamperometry test.

#### (1) OER

CV curves were carried out in the potential of  $0 \sim 1.3 \text{ V vs. } E_{\text{Hg/HgO}}$  at  $40 \text{ mV s}^{-1}$  for 1000 cycles. Electrochemical impedance spectroscopy (EIS) was performed in the range of  $0.01 \sim 10^5 \text{ Hz}$  at  $5 \text{ mV}$  with the potential of  $1.617 \text{ V vs. RHE}$ . Multipotential experiment was carried out from  $1.617 \text{ V vs. RHE}$  to  $2.117 \text{ V vs. RHE}$  with a step of  $0.1 \text{ V}$ , then from  $2.117 \text{ V vs. RHE}$  to  $1.617 \text{ V vs. RHE}$  with a step of  $-0.1 \text{ V}$ . Multicurrent experiment was performed with the range of  $50 \sim 300 \text{ mA cm}^{-2}$  at a step of  $50 \text{ mA cm}^{-2}$ , subsequently, from  $300 \text{ mA cm}^{-2}$  to  $50 \text{ mA cm}^{-2}$  at a step of  $-50 \text{ mA cm}^{-2}$ . The stability experiment was carried out through the chronoamperometry ( $J-t$ ) at  $30 \text{ mA cm}^{-2}$  for 50 h.

#### (2) HER

CV curves were carried out in the range of  $-1.8 \sim -0.8 \text{ V vs. } E_{\text{Hg/HgO}}$  at  $40 \text{ mV s}^{-1}$  for 1000 cycles. EIS was performed in the range of  $0.01 \sim 10^5 \text{ Hz}$  at  $5 \text{ mV}$  with the potential of  $-0.283 \text{ V}$ . Multipotential experiment was carried out from  $-0.783 \text{ V vs. RHE}$  to  $-0.283 \text{ V vs. RHE}$  with a step of  $0.1 \text{ V}$ , then from  $-0.283 \text{ V vs. RHE}$  to  $-0.783$

V vs. RHE with a step of -0.1 V. Multicurrent experiment was performed from -300 mA cm<sup>-2</sup> to -50 mA cm<sup>-2</sup> at a step of 50 mA cm<sup>-2</sup>, then from -50 mA cm<sup>-2</sup> to -300 mA cm<sup>-2</sup> at a step of -50 mA cm<sup>-2</sup>. The stability experiment was carried out through  $J-t$  at -50 mA cm<sup>-2</sup> for 50 h.

## 2. Supplementary Figures

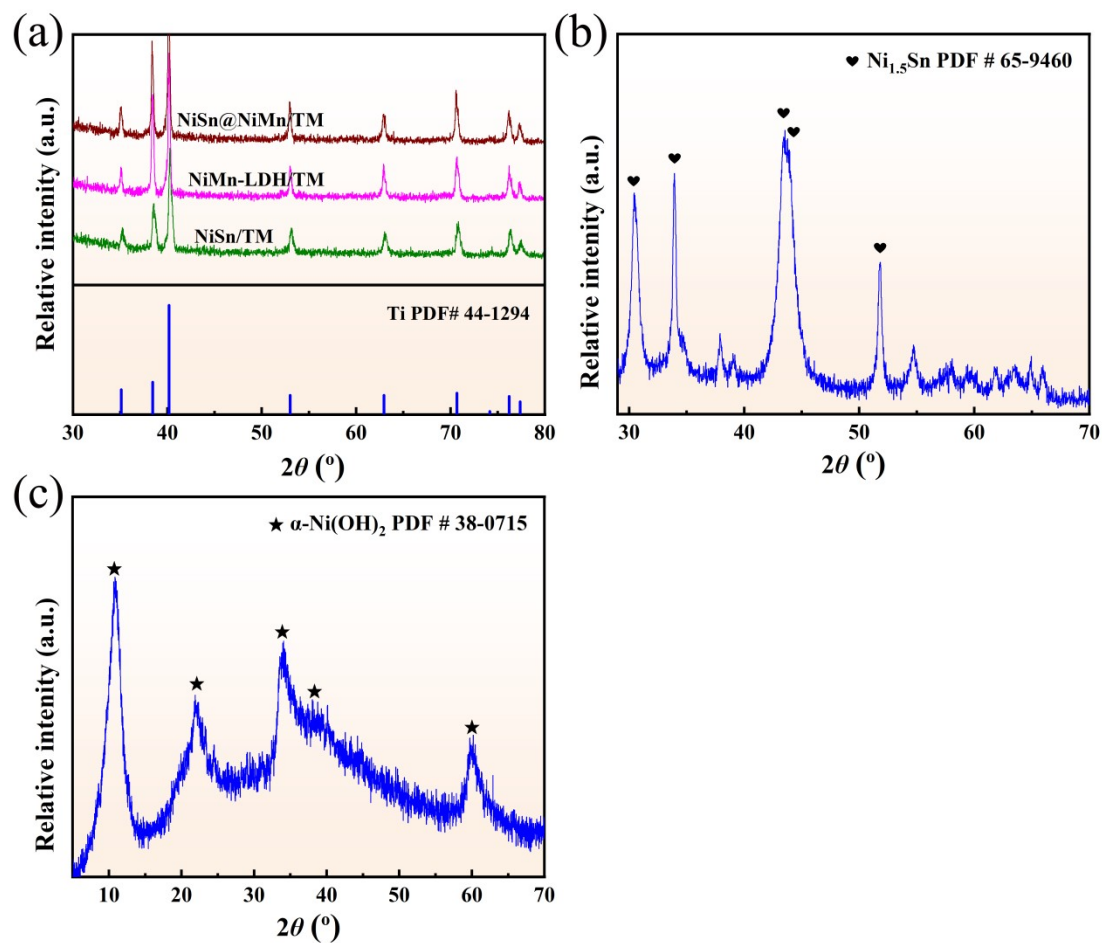

**Fig. S1** XRD patterns of as-prepared samples, (a)  $\text{NiSn/TM}$ ,  $\text{NiMn-LDH/TM}$ ,  $\text{NiSn@NiMn-LDH/TM}$ , (b)  $\text{NiSn}$  powder, (c)  $\text{NiMn-LDH}$  powder.

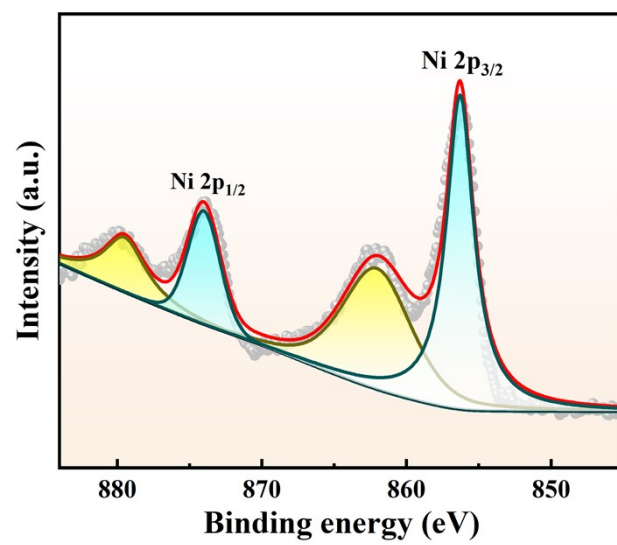

**Fig. S2** Ni 2p spectrum of NiSn@NiMn-LDH/TM.

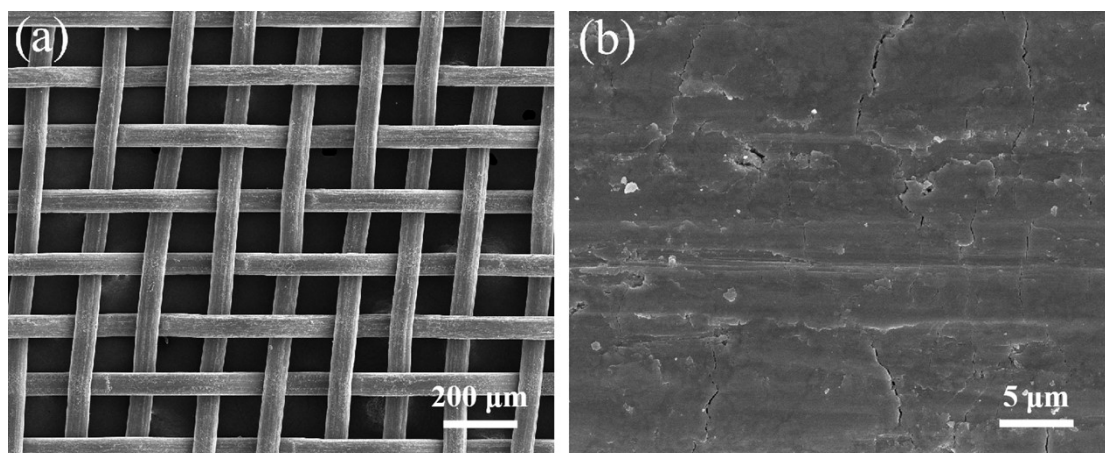

**Fig. S3** SEM images of TM at different magnification (a) low-magnification, (b) high-magnification.



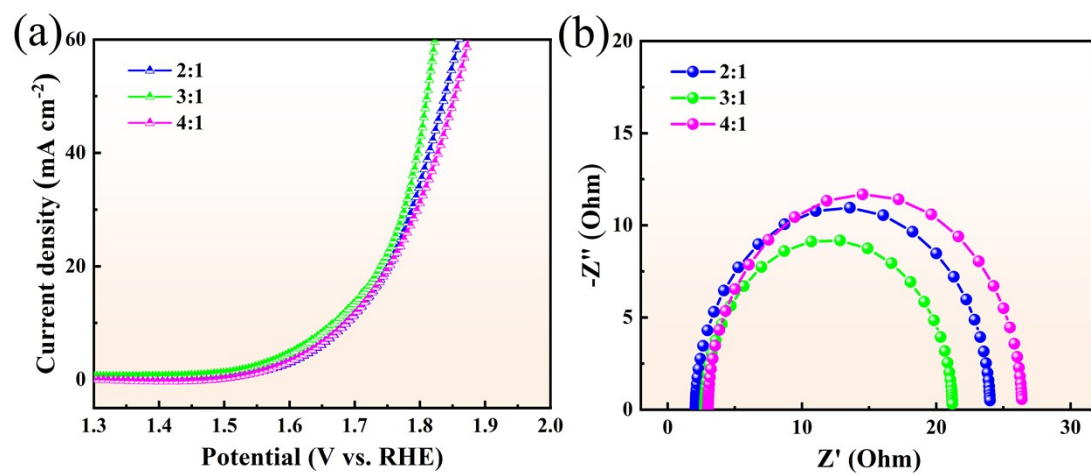

**Fig. S4** OER performance of NiSn/TM electrode with the different molar ratio of Ni to Sn, (a) LSV curves, (b) EIS Nyquist plots.

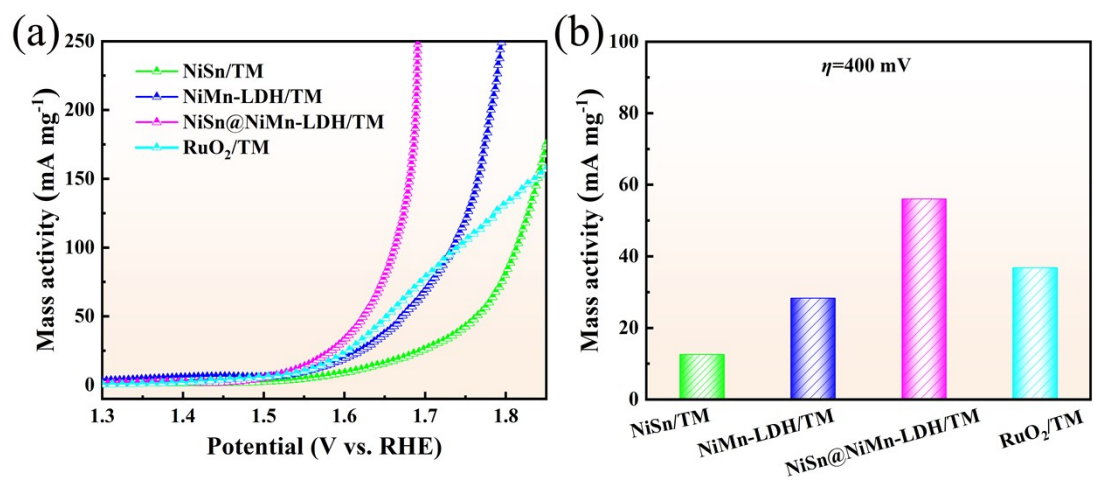

**Fig. S5** (a) Mass activity curves of the as-fabricated electrocatalysts, (b) Mass activity values at the overpotential of 400 mV for OER.

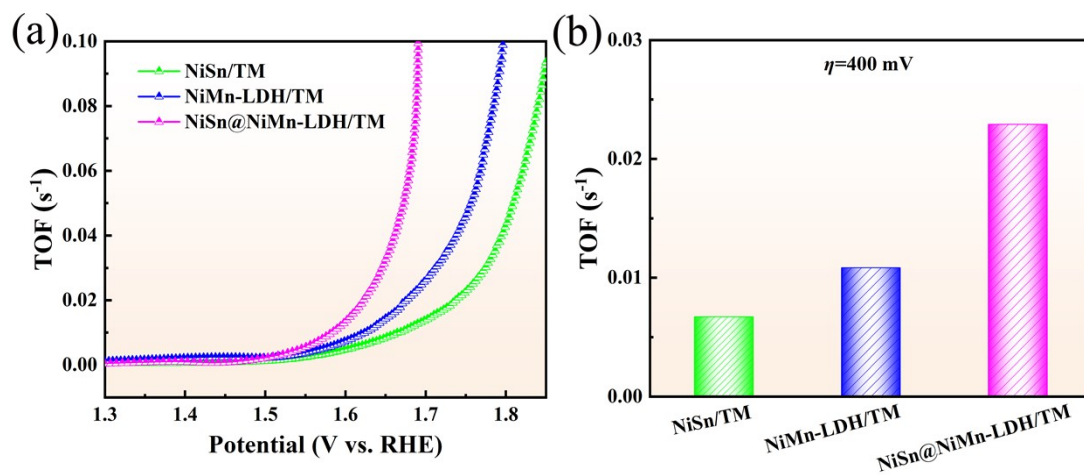

**Fig. S6** (a) TOF curves of the as-fabricated electrocatalysts, (b) TOF values at the overpotential of 400 mV for OER.

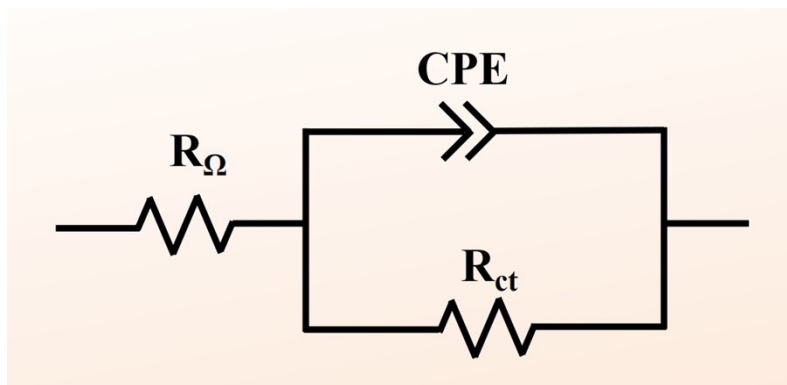

**Fig. S7** Equivalent circuit model (Randle's circuit) for EIS plot fitting.

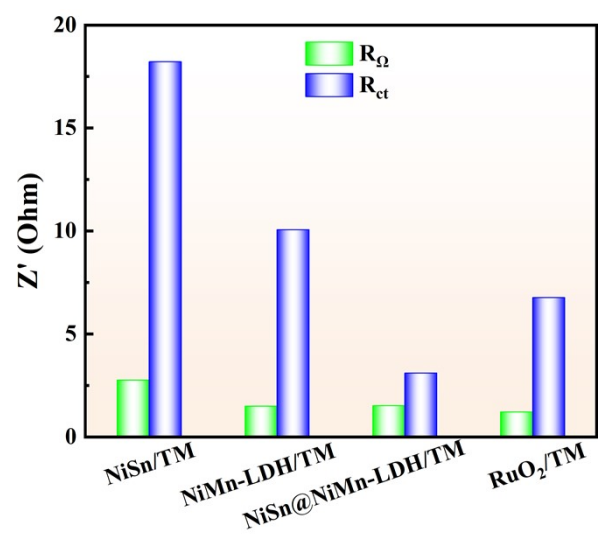

**Fig. S8** EIS parameter at 1.617 V vs. RHE for OER.

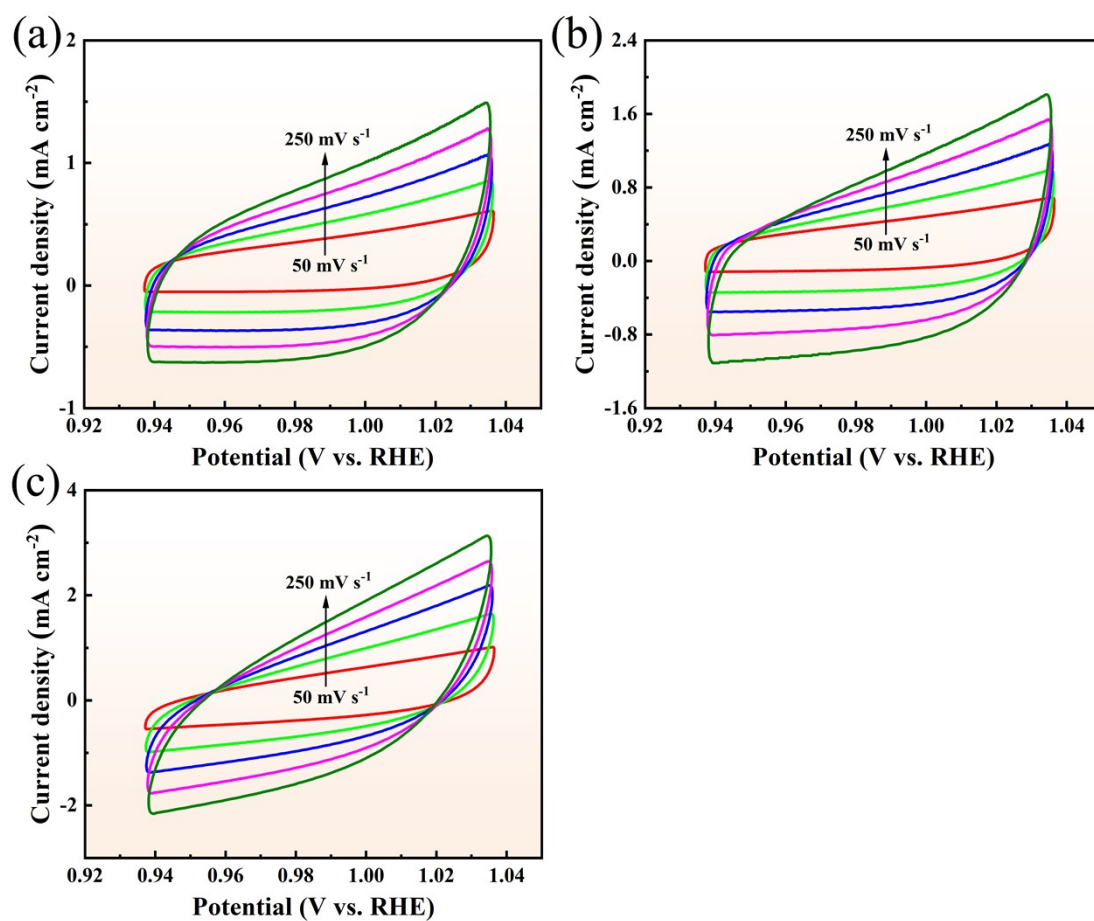

**Fig. S9** CV curves of (a) NiSn/TM, (b) NiMn-LDH/TM, (c) NiSn@NiMn-LDH/TM at the scanning rates of 50, 100, 150, 200, 250  $\text{mV s}^{-1}$  in 1 M KOH with the potential of 0.937~1.037 V vs. RHE (OER).

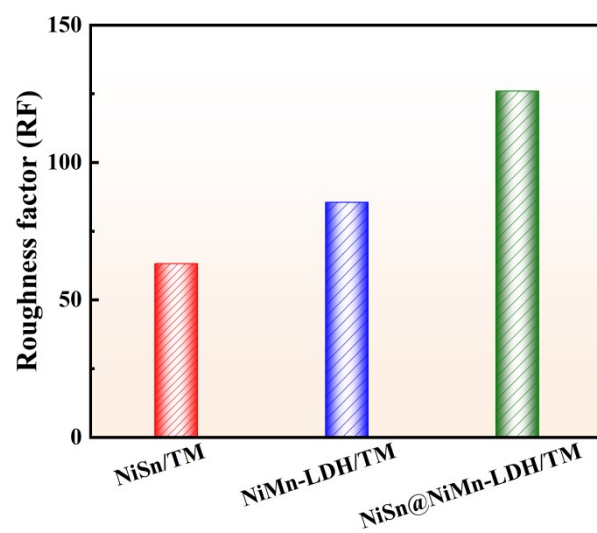

**Fig. S10** Roughness factor of the as-constructed electrodes for OER.

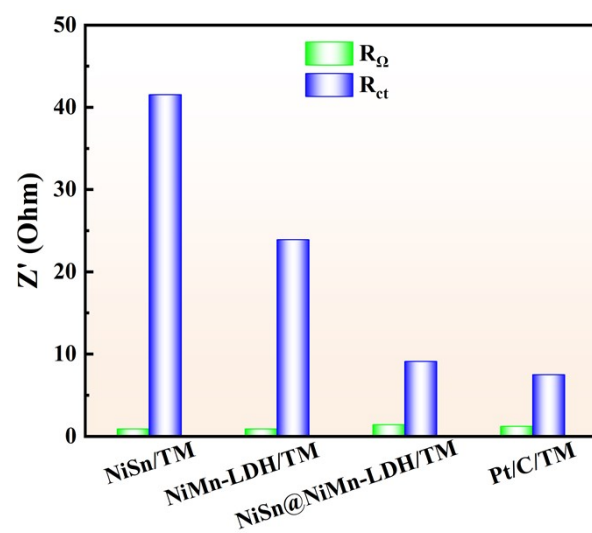

**Fig. S11** EIS parameter at -0.283 V vs. RHE for HER.



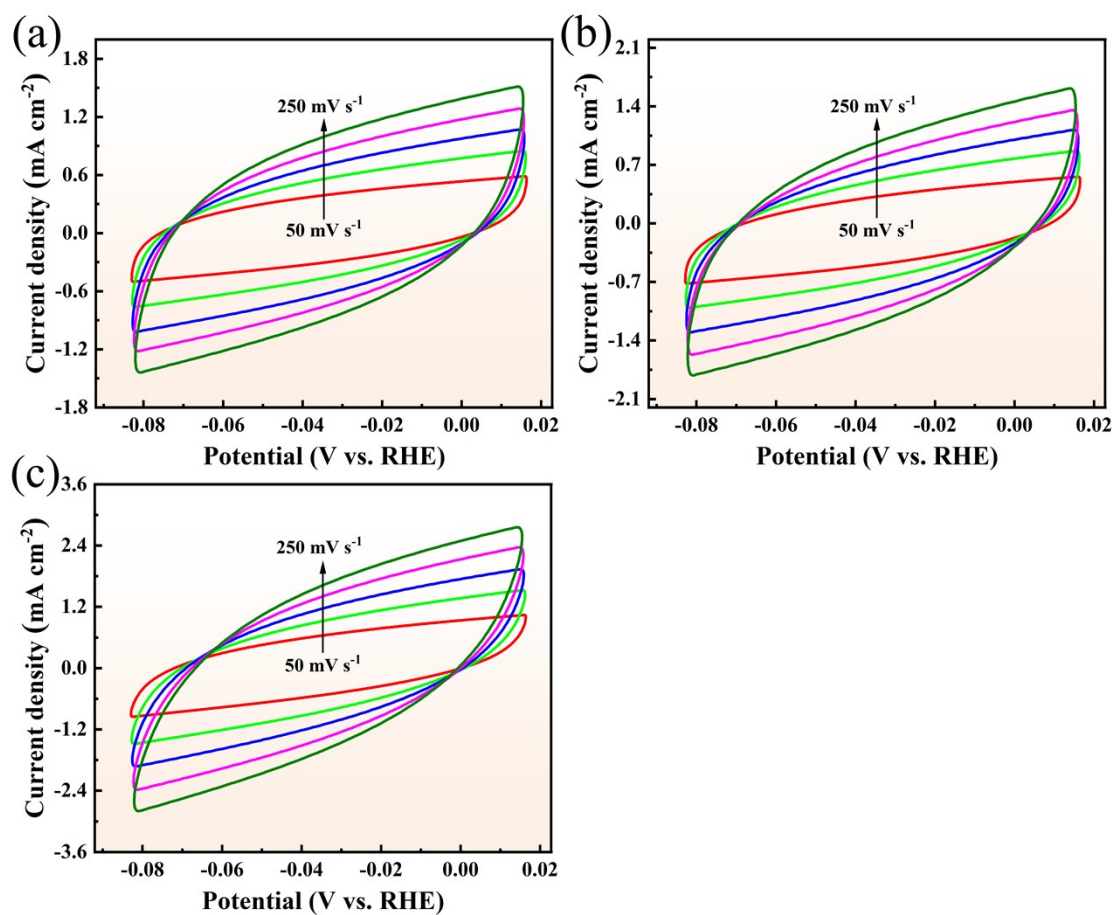

**Fig. S12** CV curves of (a) NiSn/TM, (b) NiMn-LDH/TM, (c) NiSn@NiMn-LDH/TM at the scanning rates of 50, 100, 150, 200, 250  $\text{mV s}^{-1}$  in 1 M KOH with the potential of -0.083~-0.017 V vs. RHE (HER).

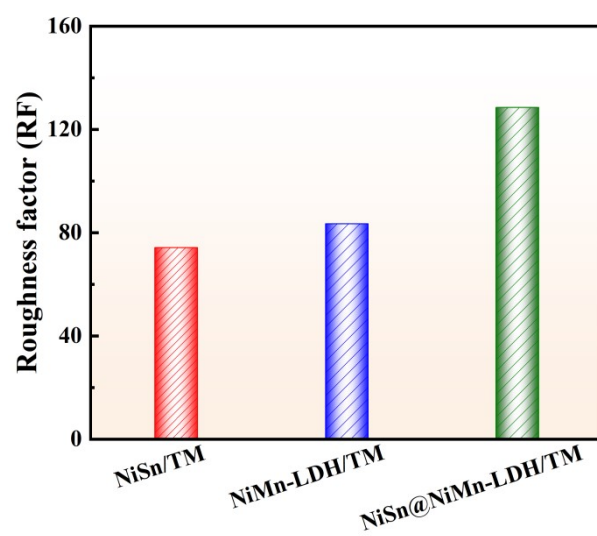

**Fig. S13** Roughness factor of the as-constructed electrodes for HER.

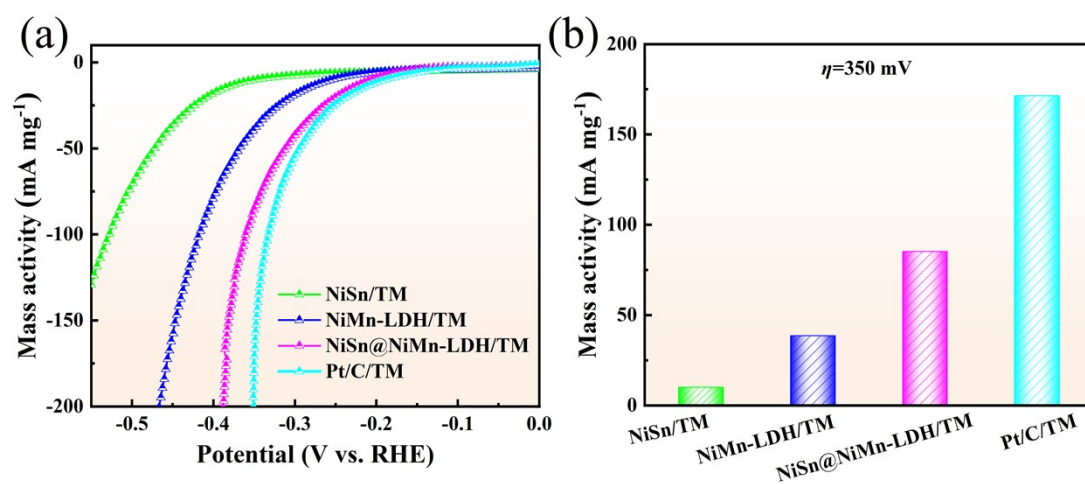

**Fig. S14** (a) Mass activity curves of the as-fabricated electrocatalysts, (b) Mass activity values at the overpotential of 350 mV for HER.

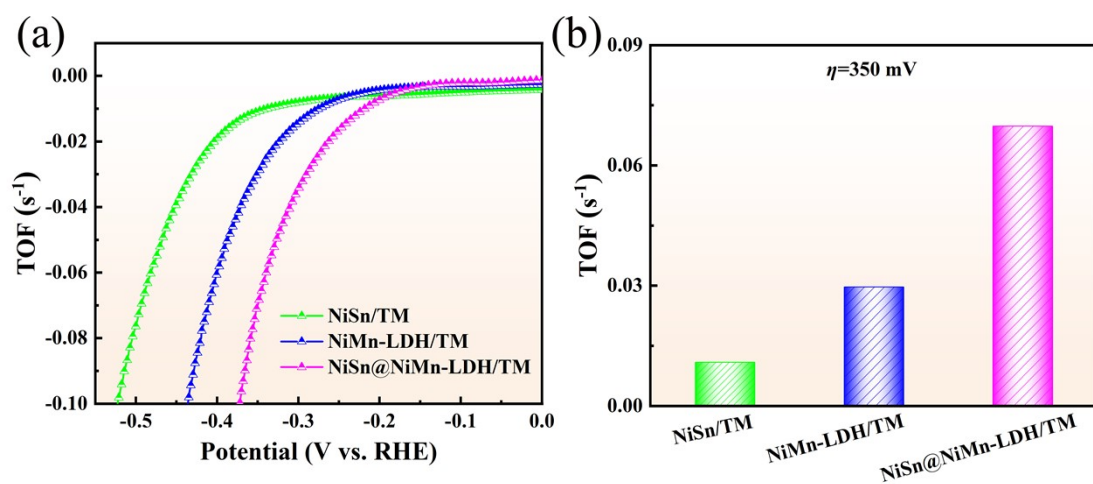

**Fig. S15** (a) TOF curves of the as-fabricated electrocatalysts, (b) TOF values at the overpotential of 350 mV for HER.

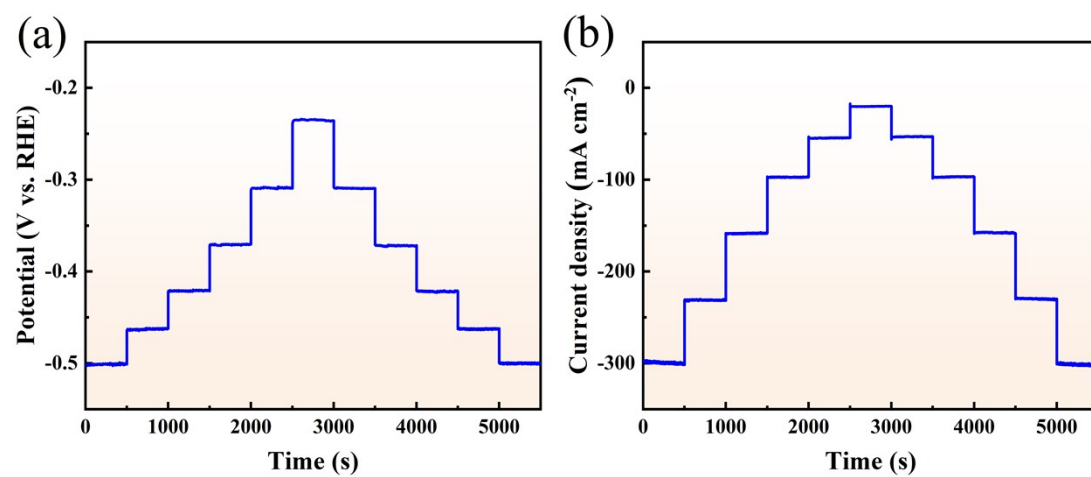

**Fig. S16** The multicurrent and multipotential curves of NiSn@NiMn-LDH/TM for HER.

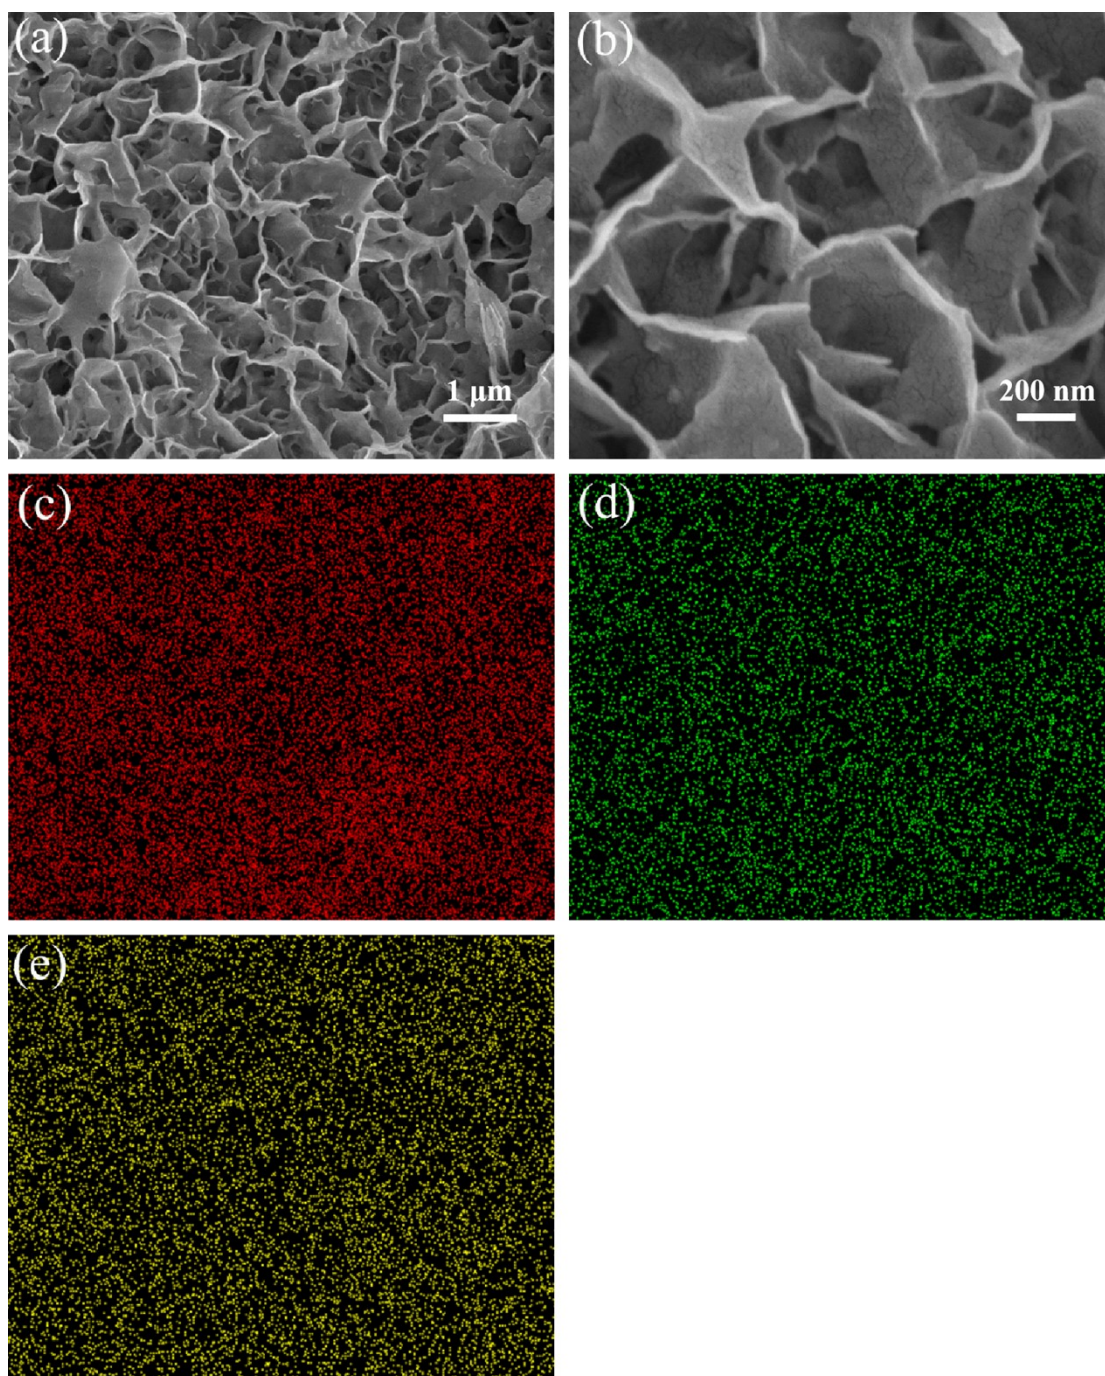

**Fig. S17** SEM images (a, b) and EDS mapping images of (c) Ni, (d) Sn, (e) Mn for NiSn@NiMn-LDH/TM after stability test for OER.



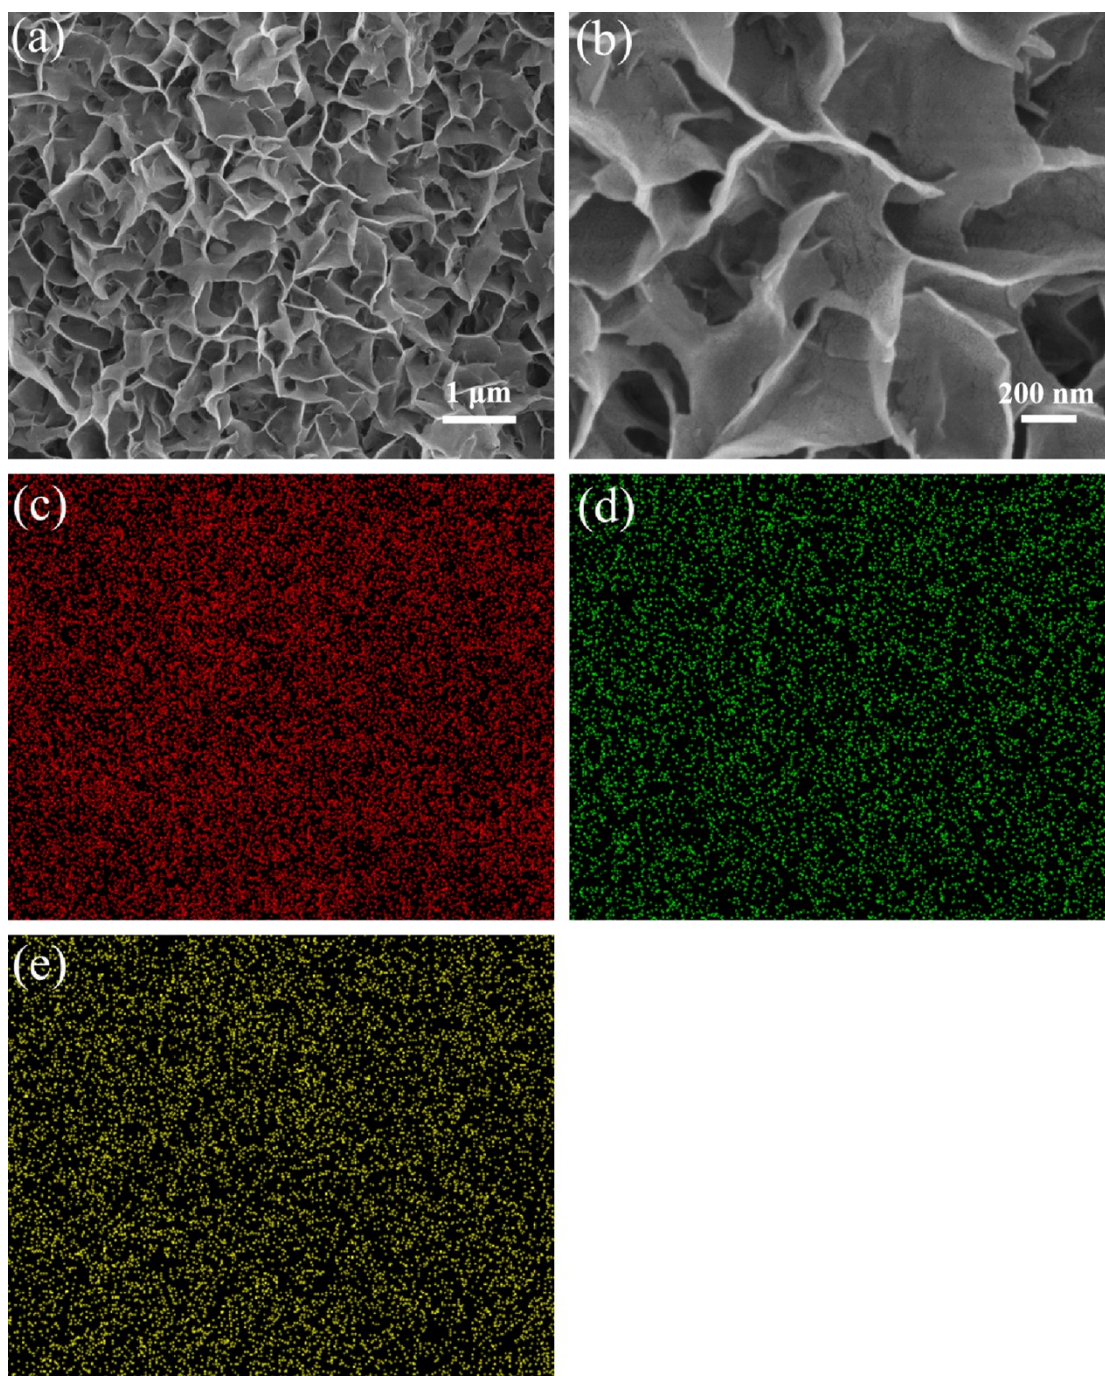

**Fig. S18** SEM images (a, b) and EDS mapping images of (c) Ni, (d) Sn, and (e) Mn for NiSn@NiMn-LDH/TM after stability test for HER.

### 3. Supplementary Tables

**Table S1** Comparison of the OER activity of NiSn@NiMn/TM with other reported non-noble metal-based electrocatalysts in 1.0 M KOH.

| Electrocatalysts                                     | Substrate          | Current density<br>(mA/cm <sup>2</sup> ) | Overpotential<br>(mV) | Reference |
|------------------------------------------------------|--------------------|------------------------------------------|-----------------------|-----------|
| NiSn@NiMn-LDH                                        | TM                 | 10                                       | 300.2                 | This work |
|                                                      |                    | 50                                       | 390.6                 |           |
| NiCo <sub>2</sub> O <sub>4</sub> @MoS <sub>2</sub>   | TM                 | 10                                       | 313                   | [4]       |
| NiCoMn                                               | TM                 | 10                                       | 334.69                | [5]       |
| Co <sub>3</sub> O <sub>4</sub> @Ti-15                | TM                 | 50                                       | 416                   | [6]       |
| NiMo                                                 | TM                 | 10                                       | 310                   | [7]       |
| W <sub>2</sub> N/WC                                  | Carbon clothes     | 10                                       | 320                   | [8]       |
| Co <sub>3</sub> S <sub>4</sub>                       | Glassy carbon      | 10                                       | 350                   | [9]       |
| CoOOH nanosheet                                      | Carbon-coated chip | 10                                       | 426                   | [10]      |
| Co <sub>2</sub> FeO <sub>4</sub>                     | Glassy carbon      | 10                                       | 359                   | [11]      |
| Fe-CoP nanoFC                                        | NF                 | 10                                       | 347                   | [12]      |
| Co <sub>2.25</sub> Fe <sub>0.75</sub> O <sub>4</sub> | Glassy carbon      | 10                                       | 350                   | [13]      |
| Ar-U-CoFe PBA                                        | NF                 | 10                                       | 305                   | [14]      |
| Yolk-shell Mn-CoP                                    | /                  | 10                                       | 330                   | [15]      |



**Table S2** The summarized double layer capacitance ( $C_{dl}$ ) and electrochemical surface area (ECSA) of the as-fabricated electrocatalysts for OER.

| Electrocatalysts | $C_{dl}$ (mF cm <sup>-2</sup> ) | ECSA (cm <sup>2</sup> ) |
|------------------|---------------------------------|-------------------------|
| NiSn/TM          | 2.53                            | 63.25                   |
| NiMn-LDH/TM      | 3.42                            | 85.50                   |
| NiSn@NiMn-LDH/TM | 5.04                            | 126.00                  |

**Table S3** Comparison of the HER activity of NiSn@NiMn/TM with other reported non-noble metal-based electrocatalysts in 1.0 M KOH.

| Electrocatalysts                                                                                        | Substrate     | Current density (mA/cm <sup>2</sup> ) | Overpotential (mV) | Reference |
|---------------------------------------------------------------------------------------------------------|---------------|---------------------------------------|--------------------|-----------|
| NiSn@NiMn-LDH                                                                                           | TM            | 10                                    | 202.6              | This work |
| Ni/TM-360 s                                                                                             | TM            | 10                                    | 205                | [16]      |
| MnNiCoFe-P <sub>2</sub>                                                                                 | TM            | 10                                    | 300                | [5]       |
| Mo doped CoS <sub>x</sub>                                                                               | TM            | 10                                    | 230                | [17]      |
| Au(NiMo)/Ti-3                                                                                           | TM            | 10                                    | 252                | [18]      |
| Ni-NiFe <sub>2</sub> O <sub>4</sub> @C                                                                  | Carbon cloth  | 10                                    | 217                | [19]      |
| Co <sub>3</sub> O <sub>4</sub> /Ppy/MWCNT                                                               | Glassy carbon | 10                                    | 290                | [20]      |
| Co SAs-Co NPs/NCFs                                                                                      | Glassy carbon | 10                                    | 205                | [21]      |
| Ni-CoSe <sub>2</sub> /BCT-900                                                                           | Glassy carbon | 10                                    | 250                | [22]      |
| Ni <sub>0.09</sub> Co <sub>2.91</sub> O <sub>4</sub> /Ti <sub>3</sub> C <sub>2</sub> T <sub>x</sub> -HT | Glassy carbon | 10                                    | 210                | [23]      |
| Mn-NiCo(OH) <sub>2</sub> /NF                                                                            | NF            | 10                                    | 246                | [24]      |
| CoFe@NiFe/NF                                                                                            | NF            | 10                                    | 240                | [25]      |
| NiMn <sub>2</sub> O <sub>4</sub> /Ni-foam-175                                                           | NF            | 10                                    | 248                | [26]      |

**Table S4** The summarized double layer capacitance ( $C_{dl}$ ) and electrochemical surface area (ECSA) of the as-fabricated electrocatalysts for HER.

| Electrocatalysts | $C_{dl}$ (mF cm <sup>-2</sup> ) | ECSA (cm <sup>2</sup> ) |
|------------------|---------------------------------|-------------------------|
| NiSn/TM          | 2.97                            | 74.25                   |
| NiMn-LDH/TM      | 3.34                            | 83.50                   |
| NiSn@NiMn-LDH/TM | 5.14                            | 128.50                  |

## 4. References

- [1] M. Tahir, L. Pan, F. Idrees, X. Zhang, L. Wang, J. J. Zou, Z. L. Wang, Electrocatalytic oxygen evolution reaction for energy conversion and storage: a comprehensive review. *Nano Energy* 2017, 37: 136-157. <https://doi.org/10.1016/j.nanoen.2017.05.022>.
- [2] L. Zhou, C. Yang, W. Zhu, R. Li, X. Pang, Y. Zhen, C. Wang, L. Gao, F. Fu, Z. Gao, Y. Liang, Boosting alkaline hydrogen evolution reaction via an unexpected dynamic evolution of molybdenum and selenium on MoSe<sub>2</sub> electrode. *Adv Energy Mater* 2022, 12: 2202367. <https://doi.org/10.1002/aenm.202202367>.
- [3] S. Niu, W. J. Jiang, Z. Wei, T. Tang, J. Ma, J. S. Hu, L. J. Wan, Se-doping activates FeOOH for cost-effective and efficient electrochemical water oxidation. *J. Am. Chem. Soc.* 2019, 141: 7005-13. <https://doi.org/10.1021/jacs.9b01214>.
- [4] W. Bao, Y. Li, J. Zhang, T. Ai, C. Yang, L. Feng, Interface engineering of the NiCo<sub>2</sub>O<sub>4</sub>@MoS<sub>2</sub>/TM heterostructure to realize the efficient alkaline oxygen evolution reaction. *Int. J. Hydrogen Energy* 2023, 48: 12176-12184. <https://doi.org/10.1016/j.ijhydene.2022.12.184>.
- [5] M. M. Hasan, A. K. Gomaa, G. E. Khedr, K. E. Salem, B. S. Shaheen, N. K. Allam, Highly durable compositionally variant bifunctional tetrametallic Ni-Co-Mn-Fe phosphide electrocatalysts synthesized by a facile electrodeposition method for high-performance overall water splitting. *Energy Fuels* 2022, 36: 14371-14381. <https://doi.org/10.1021/acs.energyfuels.2c03266>.
- [6] Z. Tao, L. Jiang, X. Jia, H. Xiao, Y. Liang, B. Yang, P. Guo, L. Zhang, H. Yang, In situ growth of Co<sub>3</sub>O<sub>4</sub> nanoneedles on titanium mesh for electrocatalytic oxygen evolution. *J Mater Sci: Mater Electron* 2021, 32: 23275-23284. <https://doi.org/10.1007/s10854-021-06812-7>.
- [7] J. Tian, N. Cheng, Q. Liu, X. Sun, Y. He, A. M. Asiri, Self-supported NiMo hollow nanorod array: an efficient 3D bifunctional catalytic electrode for overall water splitting. *J. Mater. Chem. A* 2015, 3: 20056. <https://doi.org/10.1039/C5TA04723D>.

- [8] J. Diao, Y. Qiu, S. Liu, W. Wang, K. Chen, H. Li, W. Yuan, Y. Qu, X. Guo, Interfacial engineering of  $W_2N/WC$  heterostructures derived from solid-state synthesis: A highly efficient trifunctional electrocatalyst for ORR, OER, and HER. *Adv. Mater.* 2019, 1905679. <https://doi.org/10.1002/adma.201905679>.
- [9] R. Zhang, L. Pan, B. Guo, Z. F. Huang, Z. Chen, L. Wang, X. Zhang, Z. Guo, W. Xu, K.P. Loh, Tracking the role of defect types in  $Co_3O_4$  structural evolution and active motifs during oxygen evolution reaction. *J. Am. Chem. Soc.* 2023, 145: 2271-2281. <https://doi.org/10.1021/jacs.2c10515>.
- [10] S. Wang, Q. Jiang, S. Ju, C. S. Hsu, H. M. Chen, D. Zhang, F. Song, Identifying the geometric catalytic active sites of crystalline cobalt oxyhydroxides for oxygen evolution reaction. *Nat. Commun.* 2022, 13: 6650. <https://doi.org/10.1038/s41467-022-34380-9>.
- [11] W. Xiang, N. Yang, X. Li, J. Linnemann, U. Hagemann, O. Ruediger, M. Heidelmann, T. Falk, M. Aramini, S. Debeer, 3D atomic-scale imaging of mixed Co-Fe spinel oxide nanoparticles during oxygen evolution reaction. *Nat. Commun.* 2022, 13: 179. <https://doi.org/10.1038/s41467-021-27788-2>.
- [12] Y. Yuan, Y. Yang, H. Xie, X. Zhong, R. Wang, Z. Xu, Trace Fe doping improved the OER and HER catalytic performance of CoP hollow nanoflower clusters. *Int. J. Hydrogen Energy* 2024, 90: 1401-1410. <https://doi.org/10.1016/j.ijhydene.2024.10.122>.
- [13] S. Saddeler, G. Bendt, S. Salamon, F. T. Haase, J. Landers, J. Timoshenko, C. Rettenmaier, H. S. Jeon, A. Bergmann, H. Wende, B. Roldan Cuenya, S. Schulz, Influence of the cobalt content in cobalt iron oxides on the electrocatalytic OER activity. *J. Mater. Chem. A* 2021, 9: 25381-25390. <https://doi.org/10.1016/10.1039/d1ta06568h>.
- [14] F. Diao, M. R. Kraglund, H. Cao, X. Yan, P. Liu, C. Engelbrekt, X. Xiao, Moderate heat treatment of CoFe Prussian blue analogues for enhanced oxygen evolution reaction performance. *J. Energy Chem.* 2023, 78: 476-486. <https://doi.org/10.1016/j.jechem.2022.11.050>.

- [15] Y. V. Kaneti, Y. Guo, N. L. W. Septiani, M. Iqbal, X. Jiang, T. Takei, B. Yuliarto, Z. A. Allothman, D. Golberg, Y. Yamauchi, Self-templated fabrication of hierarchical hollow manganese-cobalt phosphide yolk-shell spheres for enhanced oxygen evolution reaction. *Chem. Eng. J.* 2021, 405: 126580. <https://doi.org/10.1016/j.cej.2020.126580>.
- [16] J. Wang, Y. Wang, T. Xie, Q. Deng, Facile and fast synthesis of Ni composite coating on Ti mesh by electrodeposition method for high-performance hydrogen production. *Mater. Lett.* 2019, 245: 138-141. <https://doi.org/10.1016/j.matlet.2019.02.119>.
- [17] J. Wang, Y. Wang, Z. Yao, T. Xie, S. Liu, Z. Jiang, Mo doped amorphous  $\text{CoS}_x$  porous leaf-like nanostructure on Ti mesh as electrocatalyst for alkaline hydrogen production. *J. Electrochem. Soc.* 2020, 167: 114510. <https://orcid.org/0000-0002-1044-1948>.
- [18] S. Barua, A. Balciunaite, J. Vaiciuniene, L. Tamašauskaite-Tamašiunaite, E. Norkus, Three-dimensional  $\text{Au}(\text{NiMo})/\text{Ti}$  catalysts for efficient hydrogen evolution reaction. *Materials* 2022, 15: 7901. <https://doi.org/10.3390/ma15227901>.
- [19] J. F. Zhang, Y. Jiang, Y. Wang, C. P. Yu, J. W. Cui, J. J. Wu, X. Shu, Y. Q. Qin, J. Sun, J. Yan, H. M. Zheng, Y. Zhang, Y. C. Wu, Ultrathin carbon coated mesoporous  $\text{Ni-NiFe}_2\text{O}_4$  nanosheet arrays for efficient overall water splitting. *Electrochim. Acta* 2019, 321: 134652. <https://doi.org/10.1016/j.electacta.2019.134652>.
- [20] S. S. Jayaseelan, N. Bhuvanendran, Q. Xu, H. N. Su,  $\text{Co}_3\text{O}_4$  nanoparticles decorated Polypyrrole/carbon nanocomposite as efficient bi-functional electrocatalyst for electrochemical water splitting. *Int. J. Hydrog. Energy* 2020, 45: 4587-4595. <https://doi.org/10.1016/j.ijhydene.2019.12.085>.
- [21] M. Wang, M. Li, Y. Zhao, N. Shi, H. Zhang, Y. Zhao, Y. Zhang, H. Zhang, W. Wang, K. Sun, Y. Pan, S. Liu, H. Zhu, W. Guo, Y. Li, Y. Liu, C. Liu, Construction of N-doped carbon frames anchored with Co single atoms and Co nanoparticles as robust electrocatalyst for hydrogen evolution in the entire pH range. *J. Energy Chem.* 2022, 67: 147-156. <https://doi.org/10.1016/j.jechem.2021.09.037>.

- [22] G. Yang, Y. Zhang, J. Liu, M. Wang, C. Gu, J. Li, In-situ growth of Ni-CoSe<sub>2</sub> on biomass-derived carbon tubes as an efficient electrocatalyst for overall water splitting. *Int. J. Hydrogen Energy* 2022, 47: 38920-38929. <https://doi.org/10.1016/j.ijhydene.2022.09.067>.
- [23] P. Xu, H. Wang, J. Liu, X. Feng, W. Ji, C.-T. Au, High-performance Ni<sub>x</sub>Co<sub>3-x</sub>O<sub>4</sub>/Ti<sub>3</sub>C<sub>2</sub>T<sub>x</sub>-HT interfacial nanohybrid for electrochemical overall water splitting. *ACS Appl. Mater. Interfaces* 2021, 13: 34308-34319. <https://doi.org/10.1021/acsami.1c08032>.
- [24] W. Xia, X. Luan, W. Zhang, D. Wu, Sulfuration of hierarchical Mn-doped NiCo LDH heterostructures as efficient electrocatalyst for overall water splitting. *Int. J. Hydrogen Energy* 2023, 48: 27631-27641. <https://doi.org/10.1016/j.ijhydene.2023.03.447>.
- [25] R. Yang, Y. Zhou, Y. Xing, D. Li, D. Jiang, M. Chen, W. Shi, S. Yuan, Synergistic coupling of CoFe-LDH arrays with NiFe-LDH nanosheet for highly efficient overall water splitting in alkaline media. *Appl. Catal. B* 2019, 253: 131-139. <https://doi.org/10.1016/j.apcatb.2019.04.054>.
- [26] P.C. Nagajyothi, K. Pavani, R. Ramaraghavulu, Jaesool Shim, Microwave synthesis of NiMn<sub>2</sub>O<sub>4</sub>/Ni-foam: Efficient bifunctional electrocatalysts for overall water splitting. *Int. J. Hydrogen Energy* 2024, 54: 691-699. <https://doi.org/10.1016/j.ijhydene.2023.09.046>.
